# Supplementary material for: Screening on-chip fabricated nanoparticles for penetrating the blood–brain barrier
Source: Royal Society of Chemistry journal article supplement (doi:10.1039/d1nr05825h), 2022-01-01
Supplement: d1nr05825h1.pdf [file d1nr05825h1.pdf]

## Supporting Information

### Screening on-chip fabricated nanoparticles for penetrating blood-brain barrier

Qinghong Hou,<sup>†a, b, c</sup> Lina Zhu,<sup>†\*a</sup> Le Wang,<sup>b</sup> Xiaoyan Liu,<sup>b</sup> Feng Xiao,<sup>b</sup> Yangzhouyun Xie,<sup>b</sup> Wenfu Zheng,<sup>\*c</sup> and Xingyu Jiang,<sup>\*b</sup>

This SI includes the following contents: Fig. S1-9

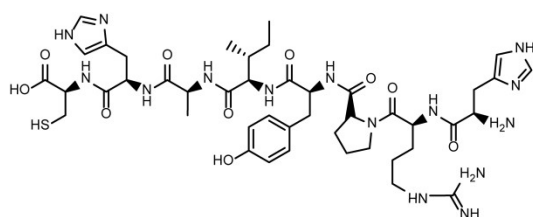

D-T7 peptide  
sequence: D-HRPYIAHC

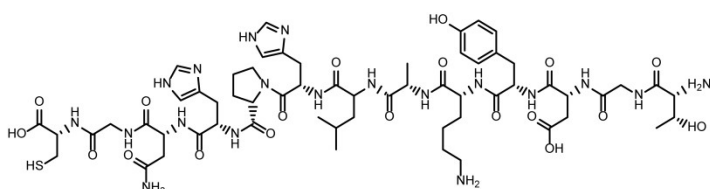

TGN peptide  
sequence: TGNYKALHPHNGC

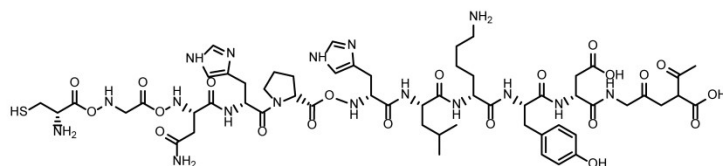

CGN peptide  
sequence: D-CGNHPLAKYNGT

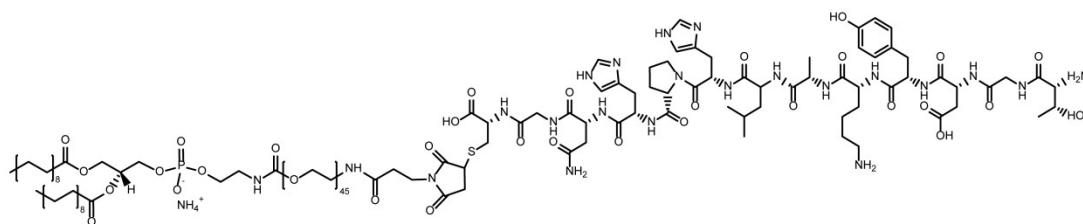

DSPE-PEG-TGN

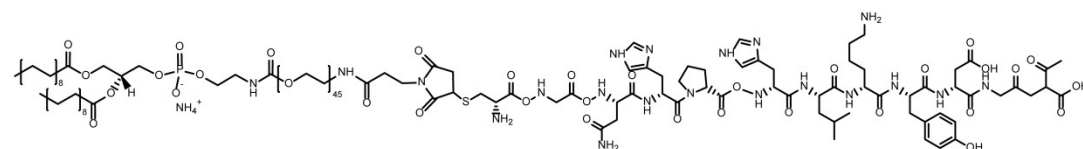

DSPE-PEG-CGN

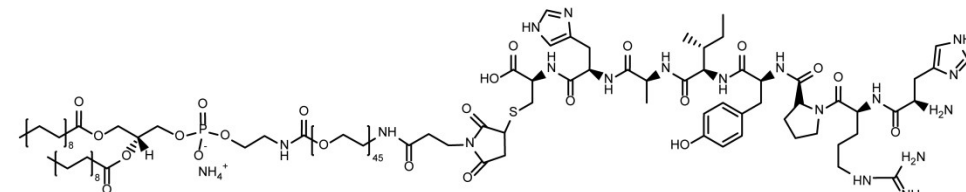

DSPE-PEG-D-T7

**Fig. S1** Structural formula of D-T7, TGN, and CGN peptides and DSPE-PEG-D-T7, DSPE-PEG-TGN, and DSPE-PEG-CGN

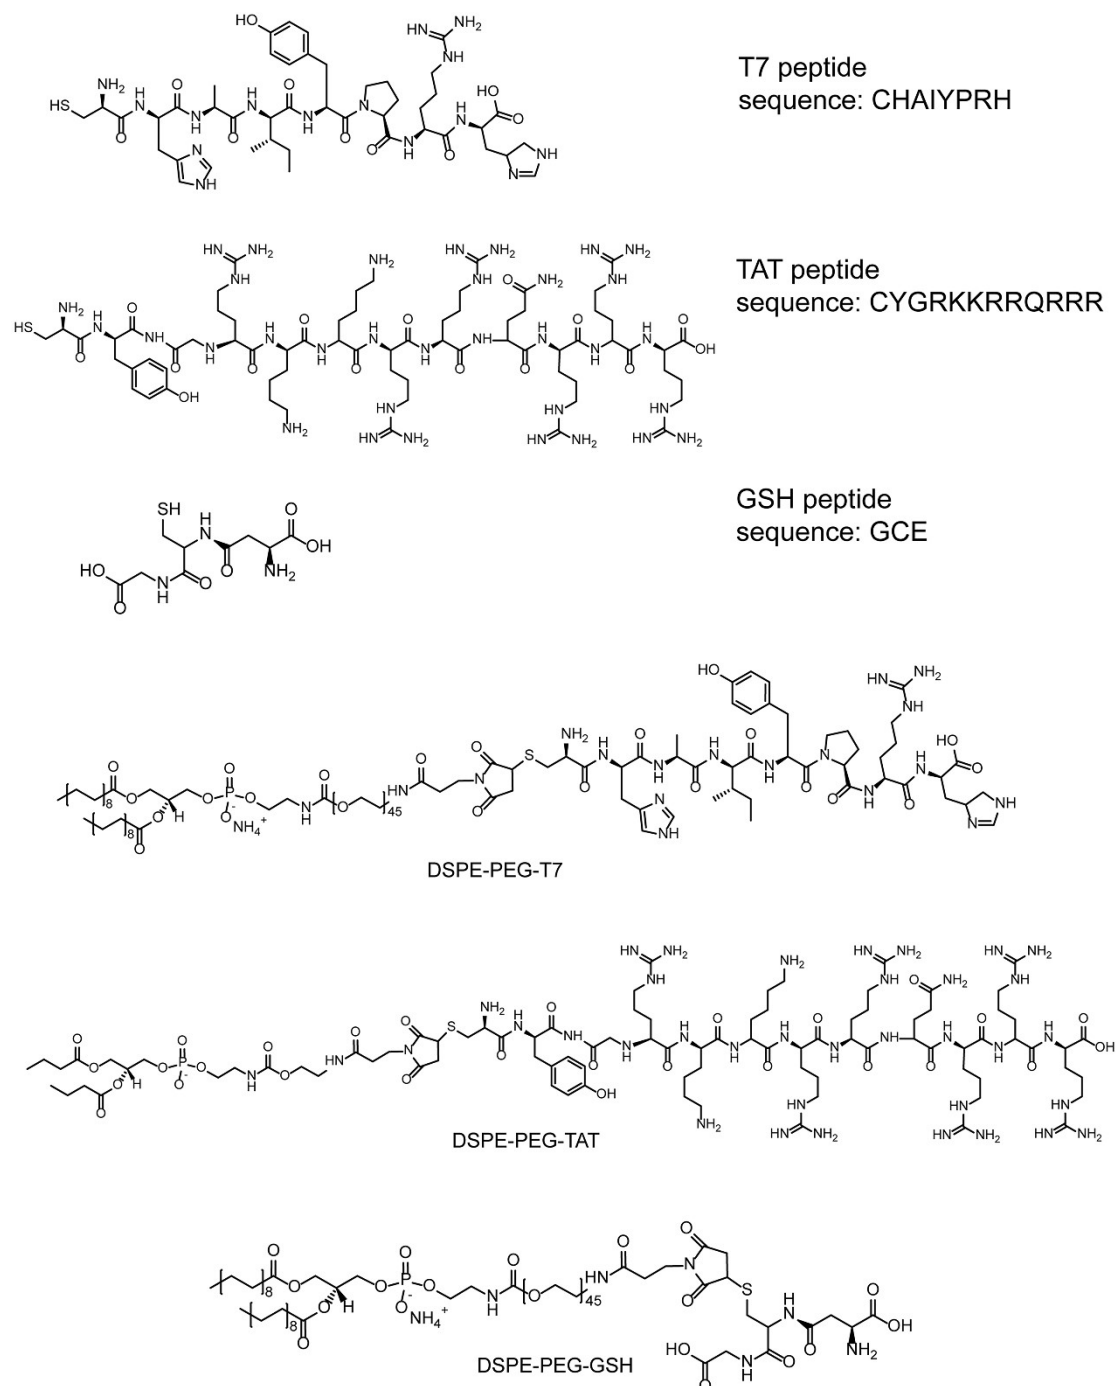

**Fig. S2** Structural formula of T7, TAT, and GSH peptides and DSPE-PEG-T7, DSPE-PEG-TAT, and DSPE-PEG-GSH.

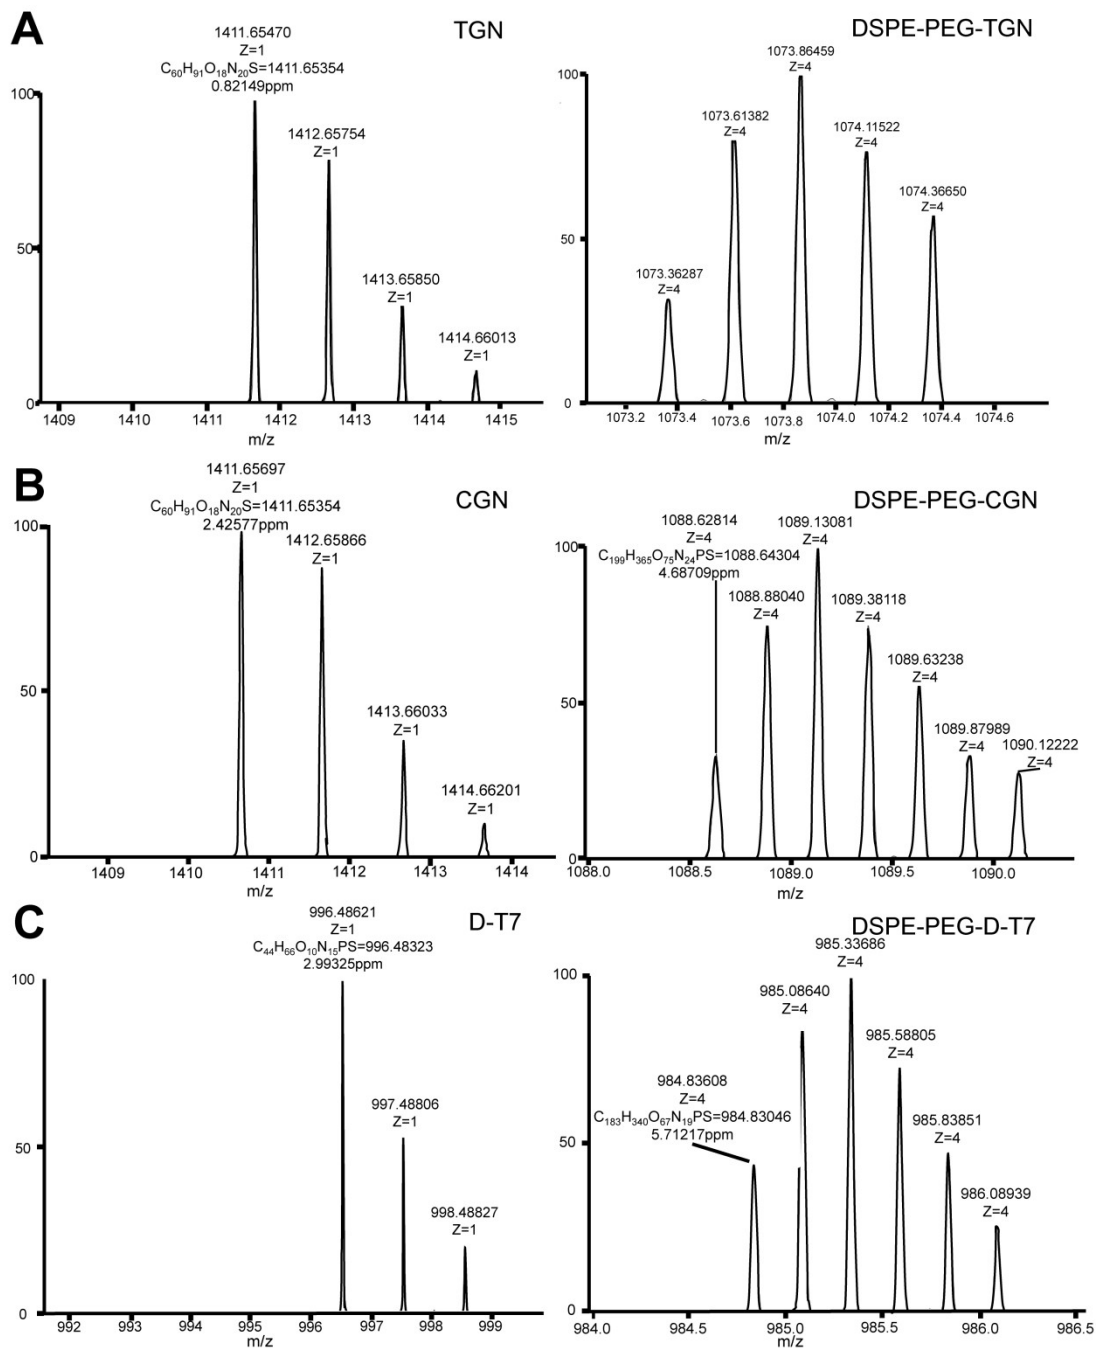

**Fig. S3** Mass spectra of TGN, CGN, and D-T7 peptides and DSPE-PEG-TGN, DSPE-PEG-CGN, and DSPE-PEG-D-T7.

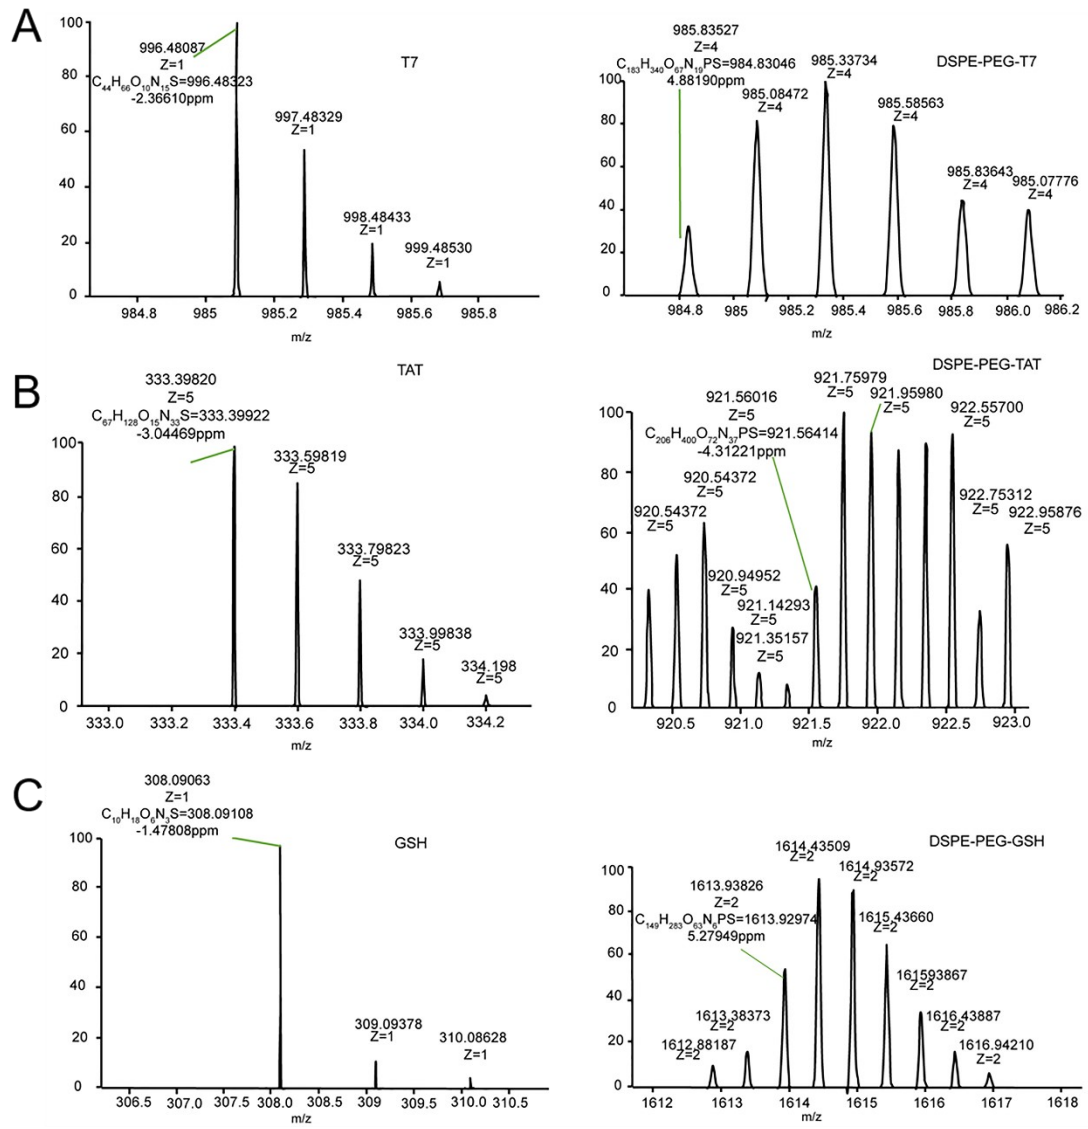

**Fig. S4** Mass spectra of T7, TAT, and GSH peptides and DSPE-PEG-T7, DSPE-PEG-TAT, and DSPE-PEG-GSH.

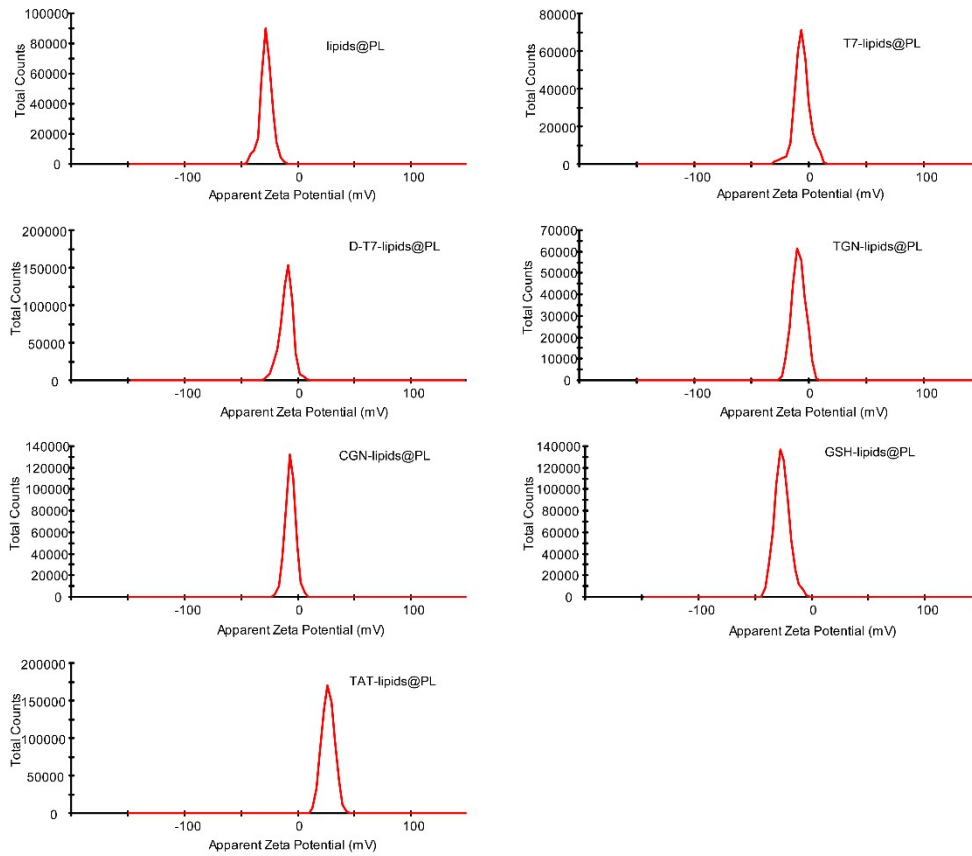

**Fig. S5** Zeta potential of the different peptide-lipids@PL nanoparticles analyzed by DLS.

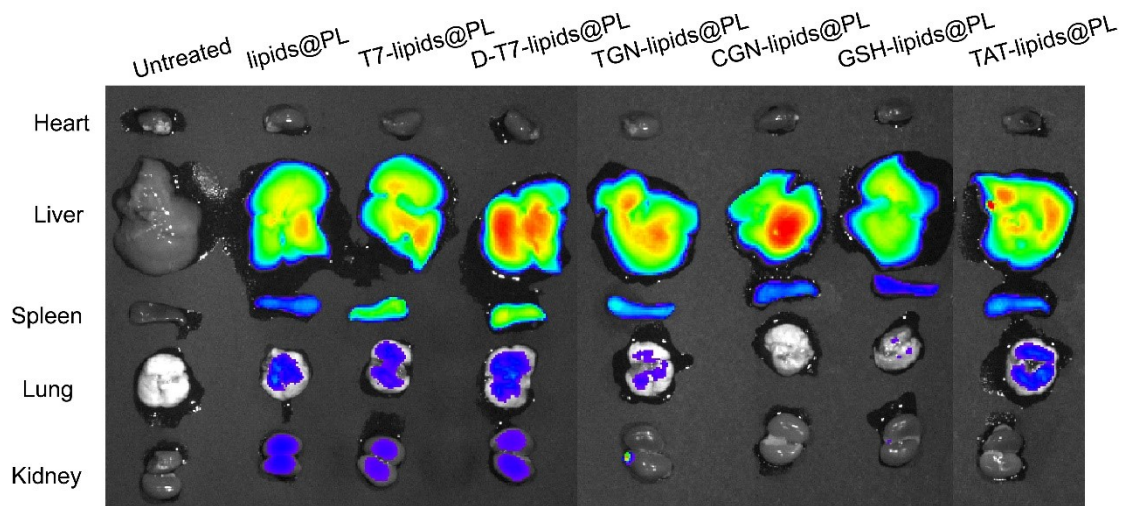

**Fig. S6** Fluorescent imaging of organs *ex vivo* 24 h after the injection of DiR-labelled nanoparticles.

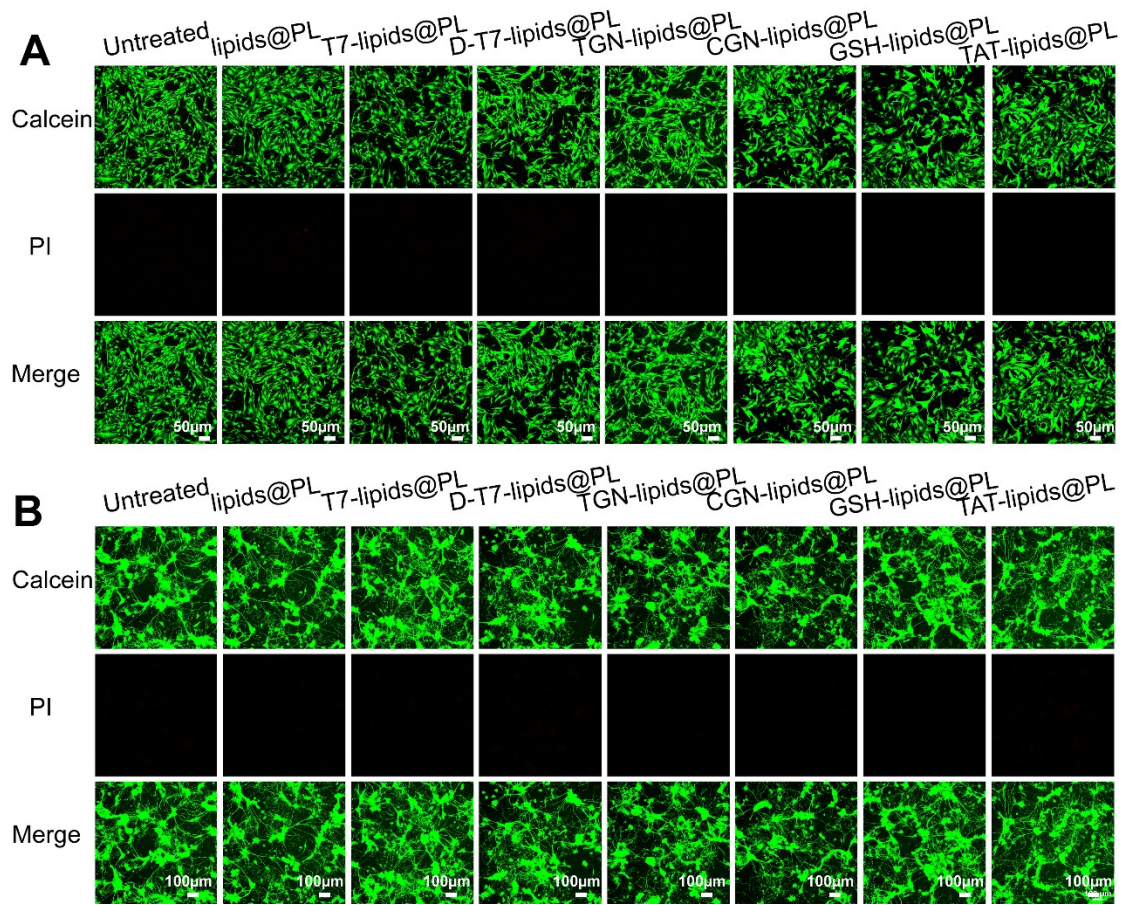

**Fig. S7** Confocal microscopy image of bEnd.3 cells (A) and hippocampal neurons (B) co-cultured with various nanoparticles for 24 hours.



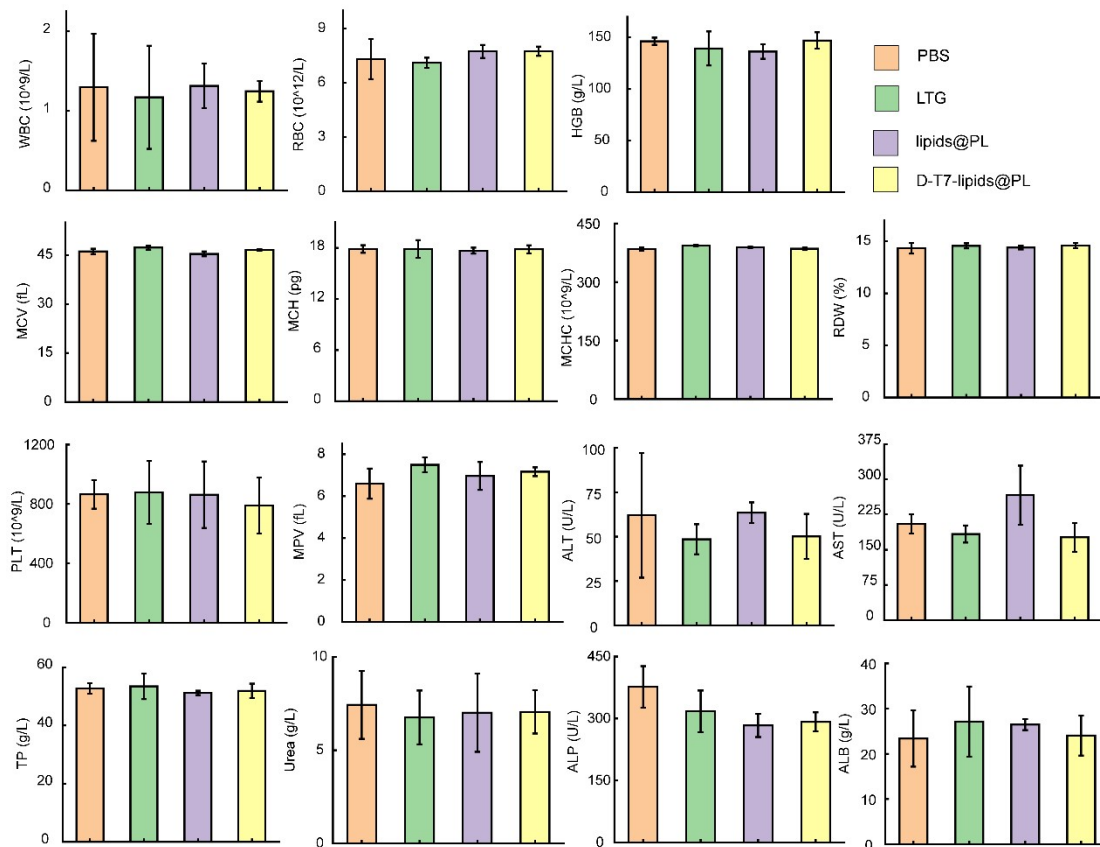

**Fig. S8** The biosafety of PBS, LTG, lipids@PL nanoparticles and D-T7-lipids@PL nanoparticles was evaluated by blood routine and blood biochemical analysis.

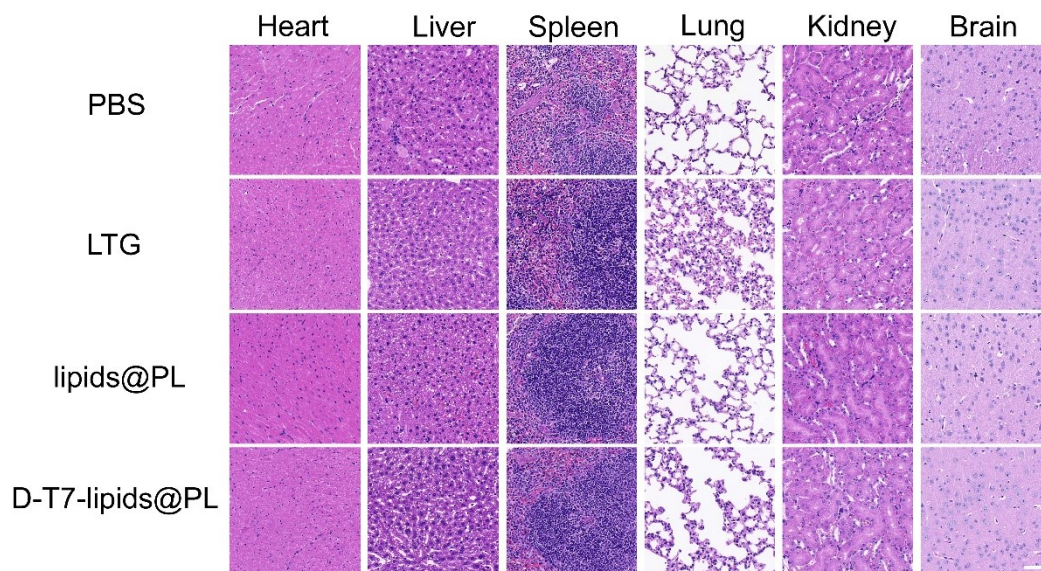

**Fig. S9** Biosafety of lipids@PL nanoparticles and D-T7-lipids@PL nanoparticles was evaluated by H&E staining analysis.
